# Supplementary material for: Topoisomerase II Inhibitors Induce DNA Damage-Dependent Interferon Responses Circumventing Ebola Virus Immune Evasion
Source: PubMed Central journal article supplement (PMC5380843; doi:10.1128/mbio.00368-17), 2017-04-04

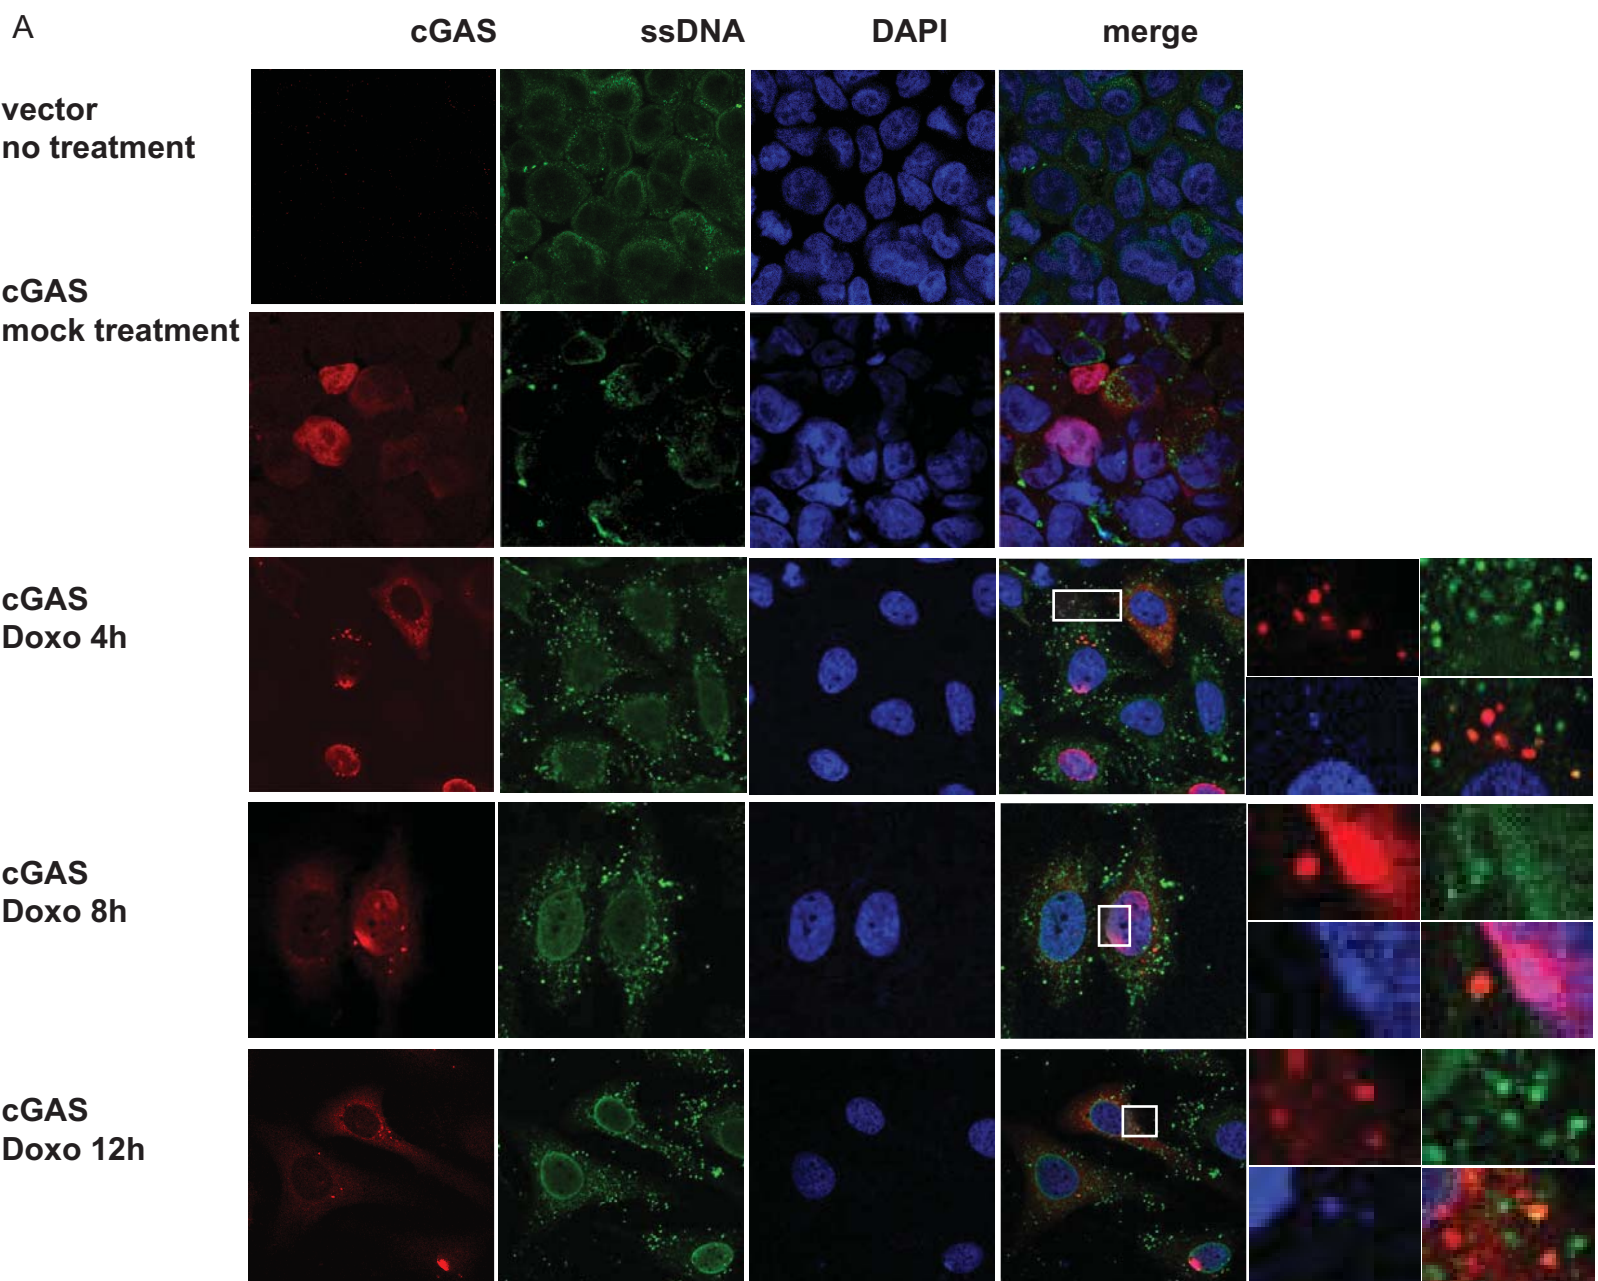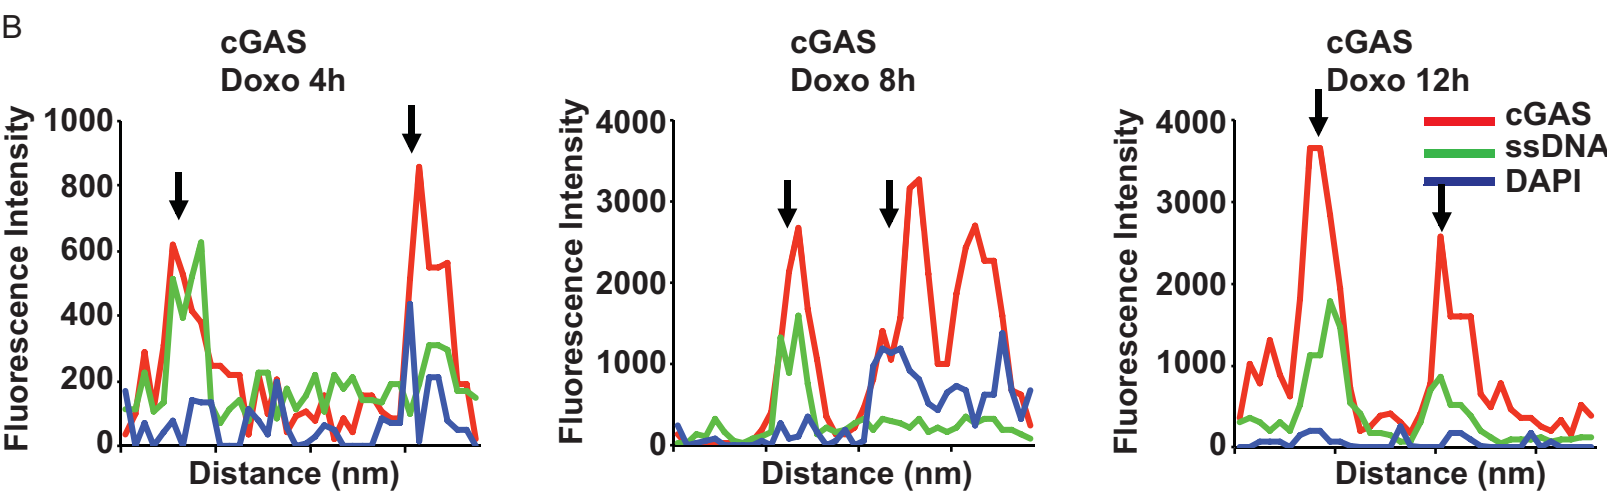

C

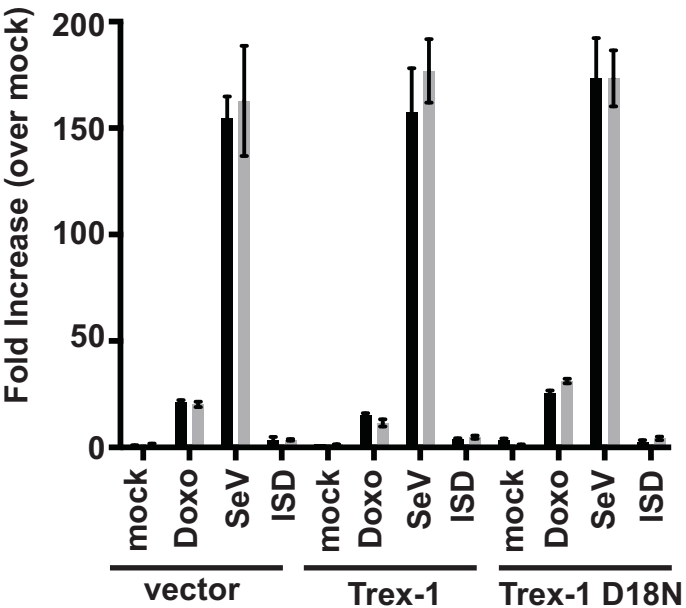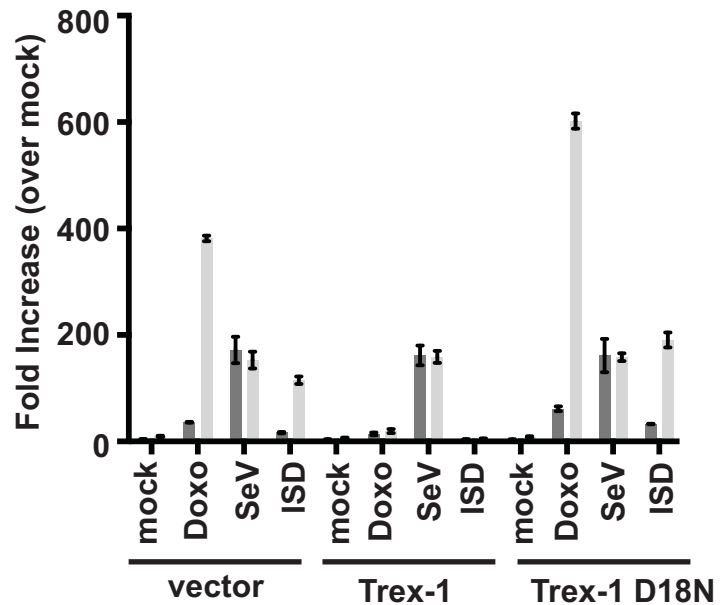

Supplement: mbo002173264sf3.pdf [file mbo002173264sf3.pdf]
